# Supplementary material for: Basic evaluation of the CRISPR/Cas system stability for application to paper-based analytical devices
Source: Royal Society of Chemistry journal article supplement (doi:10.1039/d4ay00848k), 2024-01-01
Supplement: d4ay00848k1.pdf [file d4ay00848k1.pdf]

Electronic Supplementary Information

## Basic evaluation of CRISPR/Cas system stability for the application of paper-based analytical devices

Yohei Tanifuji, Hikaru Suzuki, Guodong Tong, Yuki Hiruta, Daniel Citterio\*

Department of Applied Chemistry, Faculty of Science and technology, Keio University, 3-14-1 Hiyoshi, Kohoku-ku,

Yokohama 223-8522, Japan. E-mail: citterio@aplc.keio.ac.jp; Tel: +81 45 566 1568

\*To whom correspondence should be addressed.

Email: citterio@aplc.keio.ac.jp

### Table of Contents

#### Abbreviations

|                  |                                                                                      |     |
|------------------|--------------------------------------------------------------------------------------|-----|
| <b>Table S1.</b> | Sequences of nucleic acids                                                           | S2  |
| <b>Table S2.</b> | Characteristics of used filter papers                                                | S3  |
| <b>Fig. S1.</b>  | Designed wax printing pattern                                                        | S4  |
| <b>Fig. S2.</b>  | Illustration of assay mechanism                                                      | S5  |
| <b>Fig. S3.</b>  | Dependence on types of stabilizers                                                   | S6  |
| <b>Fig. S4.</b>  | Statistical comparison related to stabilizers                                        | S7  |
| <b>Fig. S5.</b>  | Long term storage stability                                                          | S8  |
| <b>Fig. S6.</b>  | Target dsDNA concentration response range                                            | S9  |
| <b>Fig. S7.</b>  | Target DNA concentration response with reagents stored in frozen state in microtubes | S10 |
| <b>Fig. S8.</b>  | Heating tolerance in solution state                                                  | S11 |
| <b>Fig. S9.</b>  | Heating tolerance without BSA blocking                                               | S12 |

**Table 1** Sequences of nucleic acids used in the current work.

| Name                 | Sequence (5'→3')                                            |
|----------------------|-------------------------------------------------------------|
| Target dsDNA (tgDNA) | TTTTTTTTTAGTACATTGCAAGATACTAAATGTGAGGTACCA                  |
| crRNA                | UAAUUUCUACUAAGUGUAGAUGUACAUUGCAAGAUACUAAA                   |
| ssDNA FQ reporter    | 56-FAM <sup>*1</sup> /TTATTATTATTATTA/3IABkFQ <sup>*2</sup> |

\*1: A single isomer derivative of fluorescein. Maximum absorbance and emission are at 495 and 520 nm.

\*2: Iowa Black<sup>®</sup> fluorescence quencher which has a broad absorbance spectrum ranging from 420 to 620 nm with peak absorbance at 531 nm.

**Table S2** Characteristics of used filter papers.

|                                  | Whatman No.1 | Whatman No. 541 | Advantec 5C                |
|----------------------------------|--------------|-----------------|----------------------------|
| Pore size ( $\mu\text{m}$ )      | 10.8         | 22              | 1                          |
| Thickness ( $\mu\text{m}$ )      | 180          | 155             | 220                        |
| Filtration speed<br>(sec/100 mL) | 150          | 34              | 570                        |
| Material                         | Cellulose    | Cotton linter   | Cotton $\alpha$ -cellulose |

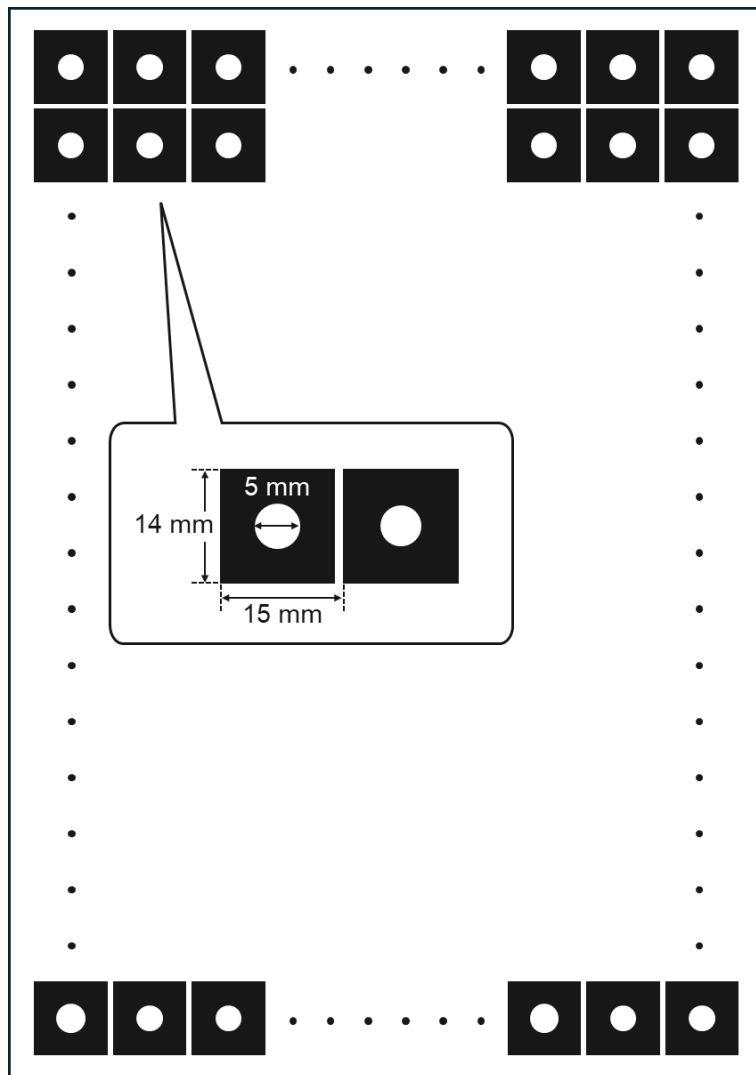

**Fig. S1** Wax printing pattern designed using Adobe Illustrator CC software. Black area was printed using black cartridges of wax-printer.

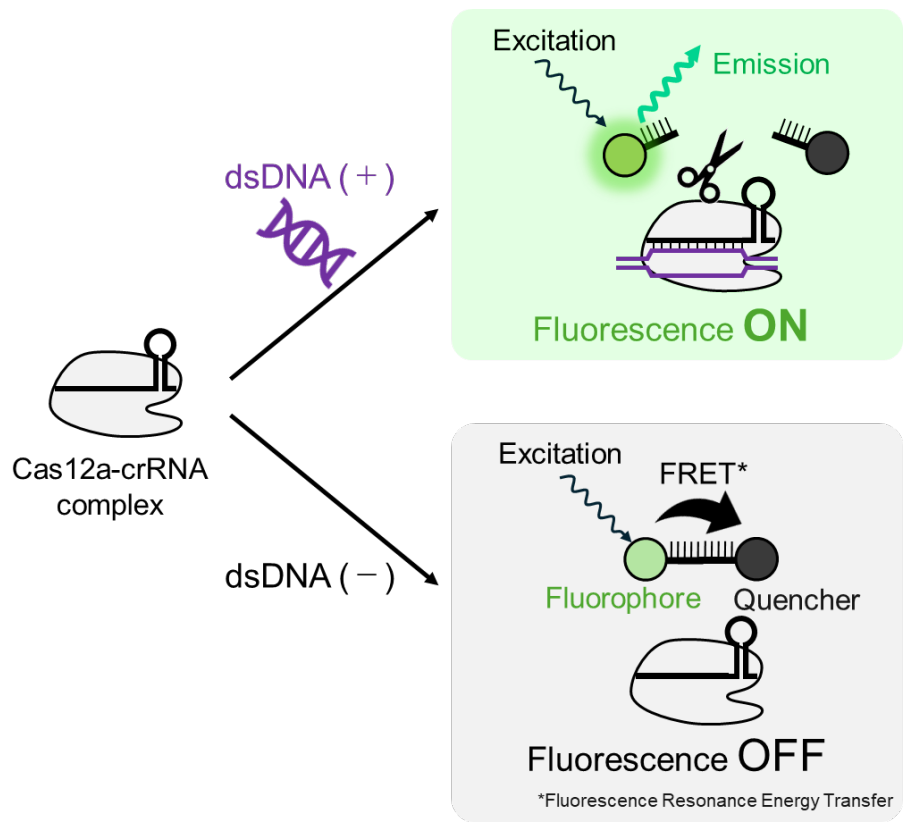

**Fig. S2** Mechanism of fluorescence emission induced by the trans-cleavage activity of CRISPR/Cas12a with ssDNA FQ reporter.

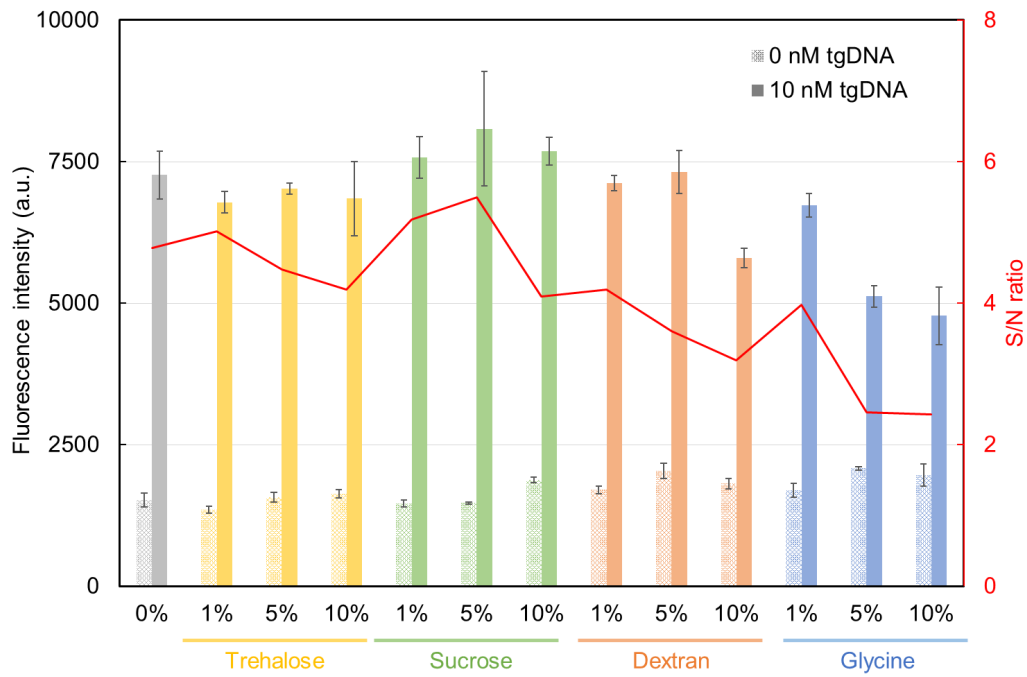

**Fig. S3** Fluorescence emission intensity (left vertical axis, bars) and S/N ratio (right vertical axis; red line) observed for micro-spots with CRISPR-related reagents spontaneously dried at room temperature on a WF1 paper substrate in the presence of various concentrations of different stabilizers; the CRISPR assay was proceeded just after drying reagents; all percentages are weight ratios; error bars represent mean values  $\pm 1\sigma$  ( $n = 3$ ).

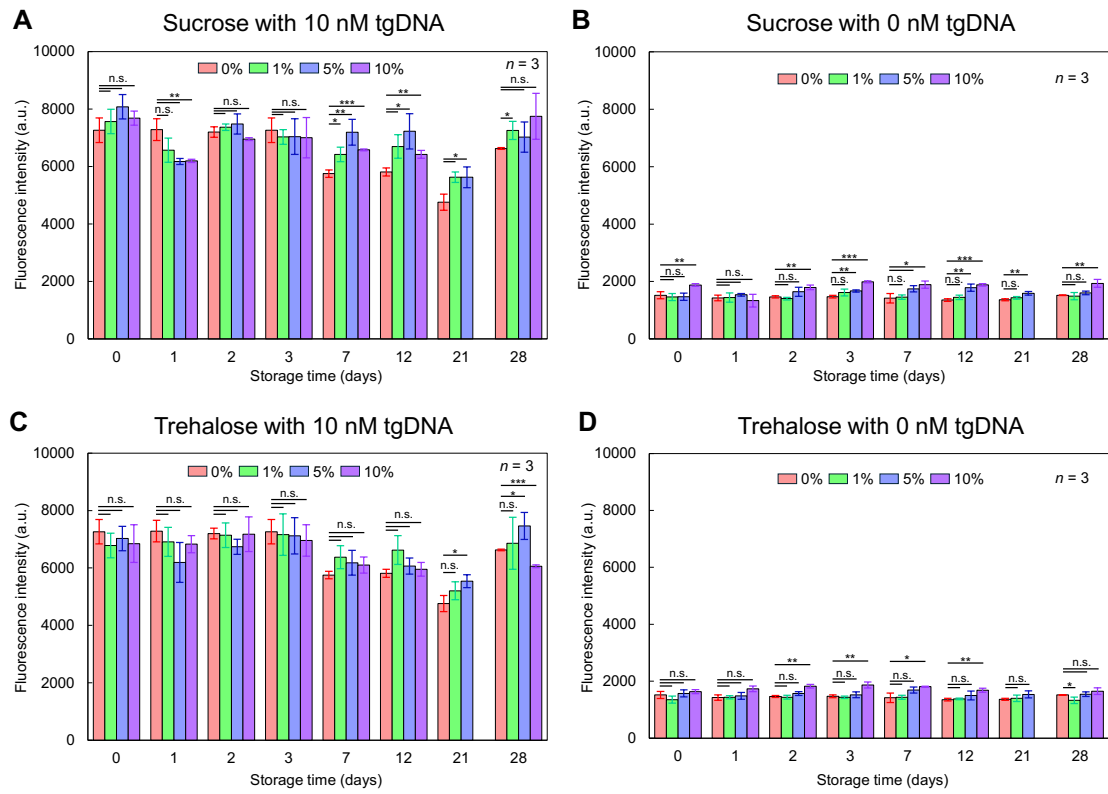

**Fig. S4** Statistical comparison over influence of type and concentration of disaccharide on the storage stability of CRISPR-related reagents spontaneously dried at room temperature on WF1 paper substrates stored at  $-20^{\circ}\text{C}$ : (A, B) absolute fluorescence emission intensities with sucrose, and (C, D) that with trehalose; error bars represent mean values  $\pm 1\sigma$  ( $n = 3$ ); n.s., not significant with  $p > 0.05$ ; the asterisks (\*, \*\*, and \*\*\*) represent significant differences with  $p$  values (\*:  $0.01 < p \leq 0.05$ , \*\*:  $0.001 < p \leq 0.01$ , \*\*\*:  $p \leq 0.001$ ).

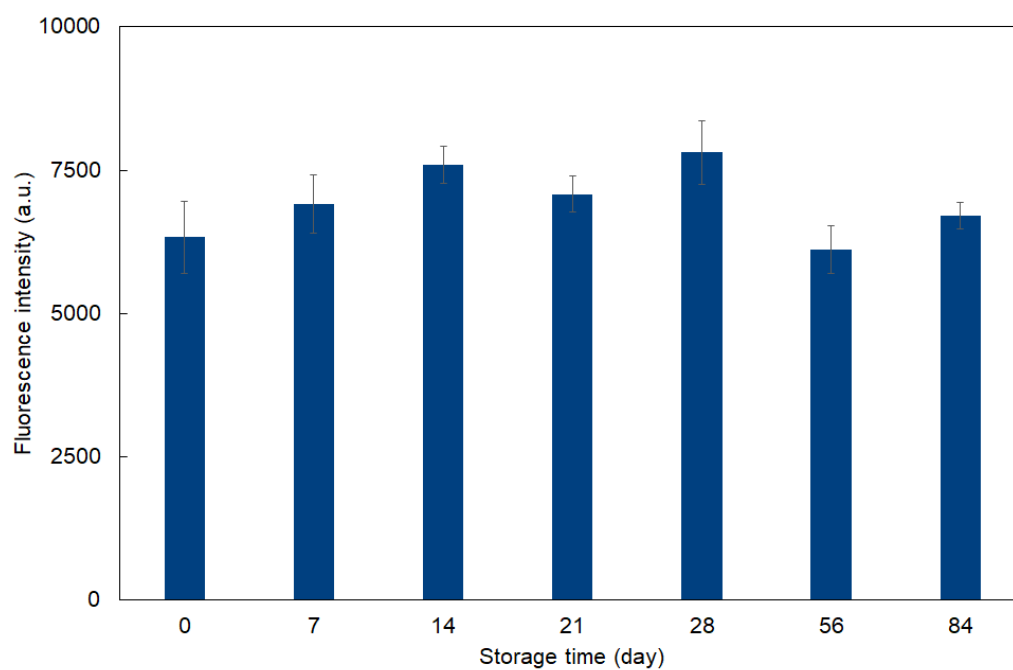

**Fig. S5** Fluorescence intensity response to 10 nM tgDNA after long term storage of CRISPR-related reagents (1% sucrose) spontaneously dried at room temperature on WF1 paper substrates stored at  $-20\text{ }^{\circ}\text{C}$ ; error bars represent mean values  $\pm 1\sigma$  ( $n = 3$ ).



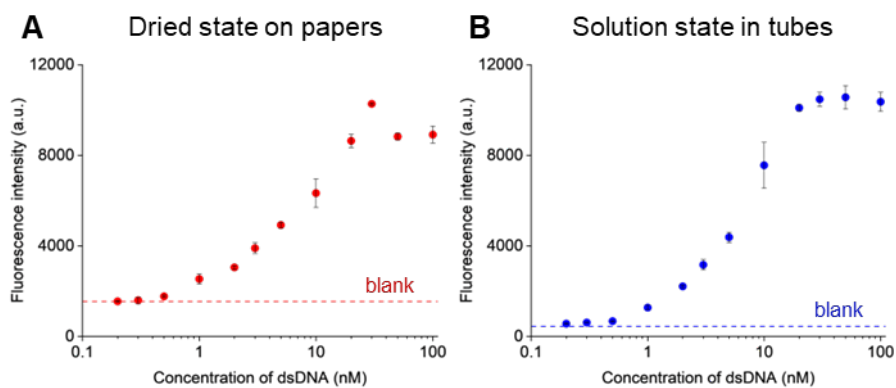

**Fig. S6** Target dsDNA concentration-dependent (0–100 nM) fluorescence emission intensities obtained with all CRISPR-related reagents stored at  $-20\text{ }^{\circ}\text{C}$ : (A) in dried state on WF1 paper substrates, and (B) in frozen state in microtubes; error bars represent mean values  $\pm 1\sigma$  ( $n = 3$ ).

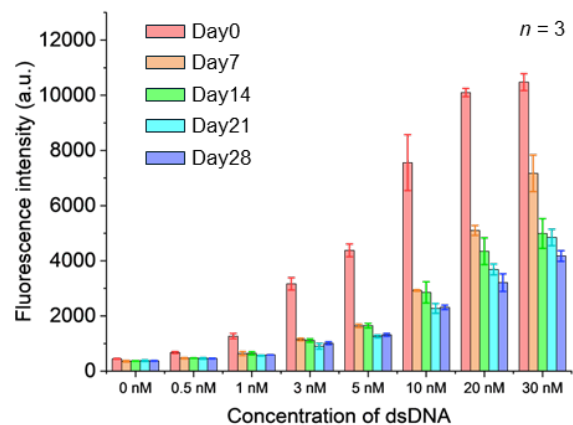

**Fig. S7** Target DNA concentration-dependent fluorescence intensities after various periods of storage at  $-20\text{ }^{\circ}\text{C}$  observed with CRISPR-related reagents (1% sucrose) stored in frozen state in microtubes; error bars represent mean values  $\pm 1\sigma$  ( $n = 3$ ).

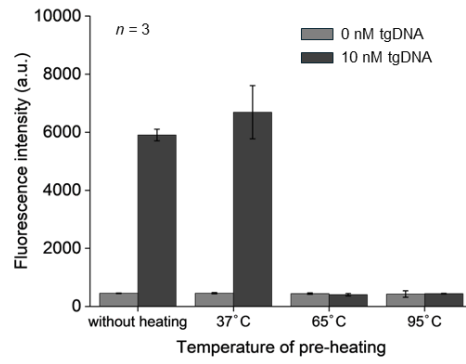

**Fig. S8** Fluorescence intensities obtained with assays performed after pre-heating at various temperatures involving CRISPR-related reagents in solution state in microtubes; error bars represent mean values  $\pm 1\sigma$  ( $n = 3$ ).

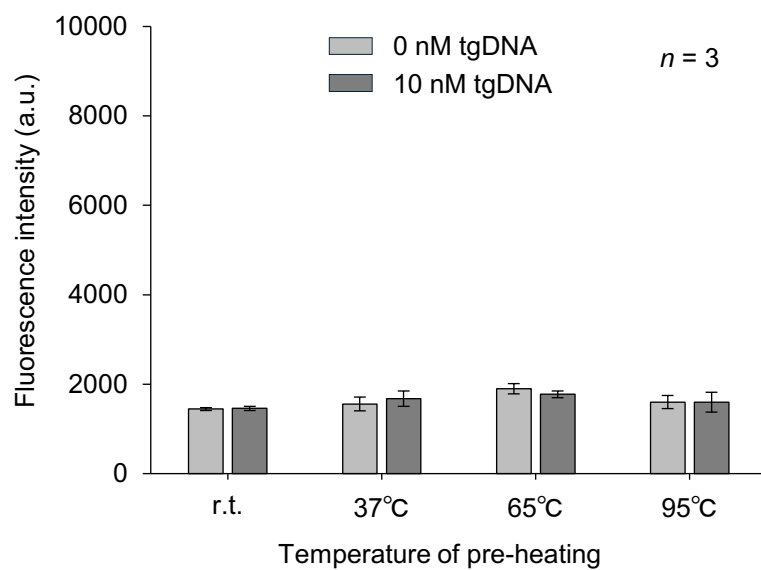

**Fig. S9** Fluorescence intensities obtained with assays performed after pre-heating at various temperatures involving CRISPR-related reagents dried at room temperature spontaneously on WF1 paper substrates without BSA blocking pre-treatment; error bars represent mean values  $\pm 1\sigma$  ( $n = 3$ ).
